**Drug target identification and virtual screening in pursuit of phytochemical intervention of**  
*Mycobacterium chelonae*

**Zarrin Basharat<sup>a\*</sup>, Shumaila Zaib<sup>a</sup>, Azra Yasmin<sup>a</sup>, Yigang Tong<sup>b</sup>**

<sup>a</sup> Microbiology & Biotechnology Research Lab, Department of Environmental Sciences, Fatima Jinnah Women University, Rawalpindi 46000, Pakistan.

<sup>b</sup> State Key Laboratory of Pathogen and Biosecurity, Beijing Institute of Microbiology and Epidemiology, Beijing 100071, China.

\*Corresponding author

Email: [zarrin.iiui@gmail.com](mailto:zarrin.iiui@gmail.com)

## Abstract

*Mycobacterium chelonae* is a rapidly growing mycobacterium present in the environment. It is associated with skin and soft tissue infections including abscess, cellulitis and osteomyelitis. Other infections by this bacterium are post-operative/transplant-associated, catheter, prostheses and even concomitant to haemodialytic procedures. In this study, we employ a subtractive genomics approach to predict the potential therapeutic candidates, intended for experimental research against this bacterium. A computational workflow was devised and executed to procure core proteome targets essential to the pathogen but with no similarity to the human host. Initially, essential *Mycobacterium chelonae* proteins were predicted through homology searching of core proteome content from 19 different bacteria. Druggable proteins were then identified and N-acetylglucosamine-1-phosphate uridylyltransferase (GlmU) was chosen as a case study from identified therapeutic targets, based on its important bifunctional role. Structure modeling was followed by virtual screening of phytochemical library (N > 2200), from 500 medicinal plants, against it. A biflavonoid daphnodorin G from *Daphne odora* was screened as having best potential for binding GlmU. Phytotherapy helps curb the menace of antibiotic resistance so treatment of *Mycobacterium chelonae* infection through this method is recommended.

## Key words

*Mycobacterium chelonae*, drug design, phytotherapy, GlmU, virtual screening.

## 1. Introduction

Mycobacteria species are categorized into two major groups, tubercular and non-tubercular mycobacteria. Nontuberculous mycobacteria are further divided into two groups, rapidly growing and slow growing mycobacteria, depending upon duration of their reproduction in suitable medium (Tortoli, 2014). *Mycobacterium chelonae* is a member of rapidly growing group, which takes less than a week for its reproduction in/on medium. It is the most commonly isolated organism among all rapidly growing mycobacteria. It is mostly found in water sources and on medical instruments such as bronchoscopes (Gonzalez-Santiago and Drage, 2015), and has been isolated from environmental, animal and human sources. *Mycobacterium chelonae* infections in human hosts have increased over time, with reports of both haematogenous and localized occurrences in the recent past (Hay, 2009).

Outbreaks due to *Mycobacterium chelonae* contaminated water and compromised injections are a rising problem. Infections have been linked to cosmetic and surgical procedures, such as trauma, surgery, injection (botulinum toxin, biologics, dermal fillers), liposuction, breast augmentation, under skin flaps, laser resurfacing, skin biopsy, tattoos, acupuncture, body piercing, pedicures, mesotherapy and contaminated foot bath (Kennedy *et al.*, 2012; Gonzalez-Santiago and Drage, 2015). *Mycobacterium chelonae* may also colonize skin wounds, as result of which patients form abscess, skin nodules and sinus tracts (Patnaik *et al.*, 2013).

Recent era has observed a trend for search of drug targets in pathogens using computational methods, with a focus on genomic and proteomic data (Shanmugam and Pan, 2013). Comparative/differential and subtractive genomics along with proteomics has been used by many researchers for the identification of drug targets in various pathogenic bacteria like *Pseudomonas aeruginosa* (Sakharkar *et al.*, 2004), *Helicobacter pylori* (Dutta *et al.*, 2006), *Campylobacter fetus* (Moolhuijzen *et al.*, 2009), *Brugia malayi* (Kumar *et al.*, 2007), *Leptospira interrogans* (Amineni *et al.*, 2010), *Listeria monocytogenes* (Sarangi *et al.*, 2015), *Mycobacterium leprae* (Shanmugam and Natarajan, 2013) etc. Determination of potential drug targets has been made possible by the availability of whole genome and their inferred protein complement sequences in public domain databases (Sarangi *et al.*, 2015).

Parenteral antibiotics against *Mycobacterium chelonae* include tobramycin, amikacin, imipenem, and tigecycline, but it has demonstrated resistance to antibiotics and disinfectants (Brown-Elliott

*et al.*, 2012; Jaén-Luchoro *et al.*, 2016). This property assists *Mycobacterium chelonae* in colonizing water systems and allows its access to humans (Jaén-Luchoro *et al.*, 2016). Till now, no specific guidelines for the treatment of *Mycobacterium chelonae* have been defined in the literature (Gonzalez-Santiago and Drage, 2015). This clearly illustrates the need to search out drug targets in the *Mycobacterium chelonae* for design of better therapies against infection by this bacterium, especially using naturally existing metabolites from microbes and plants. In the current study, subtractive proteomics was applied to identify essential druggable proteins in *Mycobacterium chelonae*. Docking of the selected protein GlmU with phytochemicals was carried out for identification of a candidate which might bind it and stop its normal cellular function, leading to bacterial lysis/death.

## **2. Material and methods**

### **2.1. Prediction of *Mycobacterium chelonae* essential proteome**

Complete proteome sequence of *Mycobacterium chelonae* CCUG 47445 with accession no: **NZ\_CP007220** was downloaded from the NCBI database. For the prediction of essential proteins, Geptop (Wei *et al.*, 2015) was installed on computer and a search was carried out to align the *Mycobacterium chelonae* protein sequences against the essential or core protein sequences from defined set of 19 bacteria with an essentiality score cut-off value range of 0.15 (Wei *et al.*, 2015). Results were saved and analyzed further.

### **2.2. Prediction of non-homologous host proteins**

In order to find the bacterial proteins which do not have similarity with human host, the set of essential protein sequences of *Mycobacterium chelonae* was subjected to BLASTP against the human proteome database (Uniprot release 2014). The standalone BLAST software (Altschul *et al.*, 1990) was used for this purpose. For identification of non-homologous proteins, an expectation (E-value) cut-off of  $10^{-2}$ , gap penalty of 11 and gap extension penalty of 1 was set as the standard. E-value cut-off ( $10^{-2}$ ), based on reported research protocols (Perumal *et al.*, 2007; Sarangi *et al.*, 2015) was considered.

### **2.3. Identification of putative drug targets**

There are several molecular and structural properties which have been explored by researchers for selecting suitable therapeutic targets in pathogenic microorganisms. These properties include determination of molecular weight, sub-cellular localization, 3D structure and druggability analysis (Hassan *et al.*, 2015; Silverio-Machado *et al.*, 2014; Uddin *et al.*, 2015). These properties

were evaluated for selection of the therapeutic targets in *Mycobacterium chelonae*. Molecular weight was calculated by using computational tools and drug target-associated literature available in the Swiss-Prot database (Boeckmann *et al.*, 2003). Subcellular localization of therapeutic targets was predicted using PSORTb (Nancy *et al.*, 2010). It uses feature support vector machine-based method and suffix tree algorithm for downstream analysis. Predictions are grouped through a Bayesian scheme into one final (consensus) result. Druggable targets were identified with BLAST hits through unified protocol from the DrugBank. Parameters were: gap cost: -1 in case of extension or opening, mismatch penalty: -3, E-value:  $1 * 10^{-5}$ , match: 1, filter algorithm: DUST and SEG (Azam and Shamim, 2014). The targets were subjected to KEGG blast for identification of associated pathways.

#### **2.4.Virtual screening of ligand against selected target**

Keeping in view the results of sub-cellular localization, molecular weight determination and druggability analysis, an essential protein (GlmU) was chosen for further downstream processing. Swiss Model was used for the prediction of 3D structure of the selected target protein (Biasini *et al.*, 2014). This tool constructs structure model by recognizing structural templates from the PDB using multiple threading alignment approaches (Wang *et al.*, 2016). The top structure used for structure prediction was that of GlmU from *Mycobacterium tuberculosis* (PDB ID: 3D8V). The structure was validated and analyzed for quality using SAVES (<https://services.mbi.ucla.edu/SAVES/>), consisting of ERRAT, VERIFY3D and Ramachandran plot analysis.

A phytochemical library consisting of 2266 phytochemical compounds was then docked with GlmU (Ashfaq *et al.*, 2013; Mumtaz *et al.*, 2016). Docking was carried out using Molecular Operating Environment (MOE) with the parameters: placement: triangle matcher, rescoring 1: London dG, refinement: forcefield, rescoring 2: affinity dG. MOE provides fast and accurate docking results based on dedicated algorithms and accurate scoring functions (Halim *et al.*, 2015). Structural preparation program embedded in MOE added the missing hydrogen atoms, corrected the charges and assigned near precise hybridization state to each residue (Junaid *et al.*, 2016).

### **3. Results and Discussion**

#### **3.1.Essential proteome prediction**

Initially, total proteome of *Mycobacterium chelonae* was subjected to core or essential proteins prediction. Geptop identified these proteins by screening against 19 bacteria (Fig. 1), based upon

orthology and phylogeny features. In the process of essential proteome mining through homology-based methods, a query protein is considered as essential if it is also present in another bacterium and experimentally identified as essential for survival. There are various methods for the prediction of essential proteins, for example single-gene knockout, transposon mutagenesis and RNA interference but all these methods are time consuming and laborious. A good alternative is high-efficiency computational methods designed specifically for this type of work (Cheng *et al.*, 2013; Wei *et al.*, 2013). Predicted essential proteins were 305 in number (Supplementary File 1), linked with significant metabolic pathways in the pathogen life cycle and necessary for its survival. In order to disrupt the function and existence of pathogen it is most important to attack those bacterial proteins which regulate important functions (e.g. nutrient uptake) in the host environment (Butt *et al.*, 2012). Latest antimicrobial drugs are designed on the principle of the inhibition of the pathogen's metabolic pathway (Lemaitre and Girardin, 2013; Uddin *et al.*, 2015). Therefore, such protein sequences may be considered as possible therapeutic targets.

### **3.2. Identification of non-host proteins**

Non-host proteins refer to those bacterial proteins which do not have homology with human proteins. If the homologous proteins are targeted, they could badly affect the metabolism of host due to similarity with host proteins. Therefore, non-host proteins could be preferred better drug targets, as side effects and cross-reactivity caused by the use of antibiotics could be evaded for harming host (Azam and Shamim, 2014; Sarangi *et al.*, 2015). Among the core proteome of *Mycobacterium chelonae*, 117 proteins (Supplementary File 2) indicated 'no hit' against the human proteome according to the set criteria. These proteins were then used for subsequent analysis.

### **3.3. Drug Target mining and analysis**

BLASTp was performed to identify significant drug target from newly selected essential proteins. Only 17 proteins had significant hits against druggable proteins present in the DrugBank (Table 1).

Molecular weight determination and druggability analysis could improve the screening process for therapeutic targets, as observed previously for numerous pathogenic bacteria and fungi (Abadio *et al.*, 2011). The molecular weight for each potential drug target was calculated (Table 2) and based upon previous studies, it is suggested that smaller proteins are readily soluble and easier to purify (Duffield *et al.*, 2010).

Sub-cellular localization is a critical factor as it helps in accessing the target gene. Cellular functions are compartment specific, so if the location of unknown protein is predicted then its function could also be known which help in selection of proteins for further study. Membrane proteins are reported as more useful target and more than 60% of the currently known drug targets are membrane proteins (Arinaminpathy *et al.*, 2009; Tsirigos *et al.*, 2015). Cytoplasm is the site of proteins synthesis and most of these proteins remain there to carry out their specific functions after synthesis. However, some proteins need to be transported to different cellular compartments for their specific function (Strzyz, 2016). The subcellular localization of non-host proteins of *Mycobacterium chelonae* was predicted and majority were demarcated as cytoplasmic (Table 1).

### 3.4. GlmU analysis and phytochemical screening

After the characterization of all druggable proteins of *Mycobacterium chelonae*, GlmU was selected for further analysis (out of 305 essential and 117 non-homologous proteins). It is a bifunctional enzyme, exhibiting both acetyltransferase and uridyltransferase activities (Moraes *et al.*, 2015; Sharma *et al.*, 2016).

GlmU has been analyzed for various bacterial species (Patin *et al.*, 2015; Rani *et al.*, 2015), including *Escherichia coli* (Brown *et al.*, 1999), *Streptococcus pneumonia* (Kostrewa *et al.*, 2001), *Haemophilus influenzae* (Mochalkin *et al.*, 2008) and *Mycobacterium tuberculosis* (Zhang *et al.*, 2009). Predicted structure of GlmU estimated RMSD of 0.5 Å. Structure was found to be a homotrimer. Ramachandran plot showed 97.2% residues in favored regions (90.4% in core, 9.4% in allowed, 0.3% in generously allowed) and no residue in disallowed region. According to VERIFY3D program, at least 80% of the amino acids should have value  $\geq 0.2$  in the 3D/1D profile and 96.55% of predicted GlmU residues had an averaged 3D-1D score  $\geq 0.2$ , thus passing the quality check. An ERRAT score of 90.66 was obtained.

Each monomer of GlmU consists of two domains: N and C-terminal domains. N-terminal domain has  $\alpha/\beta$  like fold, similar to dinucleotide-binding Rossmann fold topology. C-terminal domain exhibits a regular left-handed  $\beta$ -helix conformation and a long  $\alpha$ -helical arm connecting both domains (Sharma *et al.*, 2016). N-terminal domain is essential for uridyltransferase activity as it catalyses the transfer of uridine monophosphate from uridine-triphosphate to N-acetylglucosamine-1-phosphate (GlcNAc1P). C-terminal domain has acetyltransferase activity as it catalyzes the transfer of an acetyl group from acetyl-CoA coenzyme to GlcN1P, in order to produce GlcNAc1P (Moraes *et al.*, 2015).

GlmU plays fundamental role in the formation of bacterial cell wall by carrying out catalysis of uridine-diphospho-N-acetylglucosamine, an important precursor in bacterial peptidoglycan cell wall (Sharma *et al.*, 2016). Activity of acetyltransferase of eukaryotic cells differ from the activity of GlmU in the way that, eukaryotic acetyltransferase occurs on GlcN6P and not on GlcN1P. These properties make GlmU suitable as the drug target (Moraes *et al.*, 2015) and it has been used for drug targeting in bacteria such as *Haemophilus influenza* (Mochalkin *et al.*, 2007) apart from designing inhibitors against it for Mycobacterial species (Li *et al.*, 2011; Tran *et al.*, 2013; Rani and Khan, 2015; Mehra *et al.*, 2016). It is also known that proteins that are involved in more than one pathway of pathogen, in addition to that they are non-host proteins, could be more effective drug targets (Sarangi *et al.*, 2015). Inactivation of bifunctional GlmU enzyme leads to loss of mycobacterial viability (Zhang *et al.*, 2008; Rani and Khan, 2015), therefore GlmU was used for docking against phytochemicals.

The possible interaction between protein and the ligand is understood computationally through molecular docking. Docking results of GlmU with compounds from 500 medicinal plants (a phytochemical library of 2266 compounds (Mumtaz *et al.*, 2016), revealed that daphnodorin G was the top scoring compound showing affinity for GlmU (Fig. 3; Table 2). It has molecular weight of 558.495 g/mol and is a metabolite of the plant *Daphne odora* (Taniguchi and Baba, 1996).

Receptor centric docking approach was employed for screening of prospective phytochemical library of compounds from more than 500 medicinal plants against GlmU of *Mycobacterium chelonae*. We focused on phytochemical screening against *Mycobacterium chelonae* GlmU because plant derived/natural compounds could be used as antibacterial therapeutics for treatment of bacterial infections (Aparna *et al.*, 2014). A comparative analysis of structural shape and chemical complementarity to GlmU was ranked, based on S value in MOE and the one with least score i.e. Daphnodorin G was obtained as best inhibitor. Analogues of Daphnodorin have been reported previously to show antibacterial and nematicidal activities (Zhuo *et al.*, 2015). Huang *et al.* (2010) reported Daphnodorin analogs as inhibitor of respiratory syncytial virus while Hu *et al.* (2000) reported its analog as moderately active against HIV-1. Further Lab testing is proposed to know about minimum inhibitory concentration value and other parameters for Daphnodorin G against *Mycobacterium chelonae*.



#### 4. Conclusion

In this study, we proposed GlmU as one of the important therapeutic drug targets for *Mycobacterium chelonae* as it is bifunctional, essential protein for pathogen and has no homology with human proteome. We have provided putative model for phytotherapy against *Mycobacterium chelonae* through virtual screening-based identification of potent metabolite from a database of more than 2000 compounds. This study could be taken as an initiative for screening and quick designing of phytotherapy against microbes using a computational *modus operandi*. It is expected that our study will also facilitate selection and screening of other *Mycobacterium chelonae* therapeutic target proteins against phytochemical and other relevant compounds for Lab testing and successful entry into drug design pipeline.

#### Acknowledgements

The authors are thankful to Dr. Waqasuddin Khan (Jamil-ur-Rahman Center for Genome Research, PCMD, ICCBS, University of Karachi) for useful comments and insights that facilitated the analysis. The authors are also thankful to Dr. Alexandra Elbakyan for help with literature.

#### Declaration of interest

The authors declare that they have no conflict of interest.

#### Funding

This research did not receive any specific grant from funding agencies in the public, commercial, or not-for-profit sectors.

#### References

- Abadio AKR, Kioshima ES, Teixeira MM, Martins NF, Maigret B, Felipe MS (2011) Comparative genomics allowed the identification of drug targets against human fungal pathogens. BMC Genomics 12(1):1.
- Aiello D, Barnes MH, Biswas EE, Biswas SB, Gu S, Williams JD, Bowlin TL, Moir DT (2009) Discovery, characterization and comparison of inhibitors of *Bacillus anthracis* and *Staphylococcus aureus* replicative DNA helicases. Bioorg Med Chem 17(13):4466-76.
- Altschul SF, Gish W, Miller W, Myers EW, Lipman DJ (1990) Basic local alignment search tool. J Mol Biol 215(3):403-10.
- Amineni U, Pradhan D, Marisetty H (2010) *In silico* identification of common putative drug targets in *Leptospira interrogans*. J Chem Biol 3:165–73.
- Anderson VE, Zaniewski RP, Kaczmarek FS, Gootz TD, Osheroff N (1999) Quinolones inhibit DNA religation mediated by *Staphylococcus aureus* topoisomerase IV changes in drug mechanisms across evolutionary boundaries J Biol Chem 274(50):35927-35932.
- Anthony KG, Strych U, Yeung KR, Shoen CS, Perez O, Krause KL, Cynamon MH, Aristoff PA, Koski RA (2011) New classes of alanine racemase inhibitors identified by high-throughput

- screening show antimicrobial activity against *Mycobacterium tuberculosis*. PLoS One 6(5):e20374.
- Aparna V, Dineshkumar K, Mohanalakshmi N, Velmurugan D, Hopper W (2014) Identification of natural compound inhibitors for multidrug efflux pumps of *Escherichia coli* and *Pseudomonas aeruginosa* using *in silico* high-throughput virtual screening and *in vitro* validation. PLoS one 9(7):e101840.
- Arinaminpathy Y, Khurana E, Engelman DM, Gerstein MB (2009) Computational analysis of membrane proteins: the largest class of drug targets. Drug Discov Today. 14(23):1130-5.
- Ashfaq UA, Mumtaz A, ul Qamar T, Fatima T (2013) MAPS Database: Medicinal plant activities, phytochemical and structural database. Bioinformatics 9(19):993.
- Azam SS, Shamim A (2014) An insight into the exploration of druggable genome of *Streptococcus gordonii* for the identification of novel therapeutic candidates. Genomics. 104(3):203-14.
- Badet B, Walsh C (1985) Purification of an alanine racemase from *Streptococcus faecalis* and analysis of its inactivation by (1-aminoethyl) phosphonic acid enantiomers. Biochem 24(6):1333-41.
- Basharat Z, Yasmin A (2015). *In silico* assessment of phosphorylation and O-β-GlcNAcylation sites in human NPC1 protein critical for Ebola virus entry. Infect Genet Evol 34: 326-338.
- Basharat Z, Messaoudi A, Ruba S, Yasmin A (2016) NQO1 rs1800566 polymorph is more prone to NOx induced lung injury: Endorsing deleterious functionality through informatics approach. Gene 591(1): 14-20.
- Boeckmann B, Bairoch A, Apweiler R, Blatter MC, Estreicher A, Gasteiger E, Martin MJ, Michoud K, O'Donovan C, Phan I, Pilbout S (2003) The SWISS-PROT protein knowledgebase and its supplement TrEMBL in 2003. Nucleic Acids Res 31(1):365-70.
- Brötz-Oesterhelt H, Knezevic I, Bartel S, Lampe T, Warnecke-Eberz U, Ziegelbauer K, Häbich D, Labischinski H (2003) Specific and potent inhibition of NAD<sup>+</sup>-dependent DNA ligase by pyridochromanones. J Biol Chem 278(41):39435-42.
- Brown K, Pompeo F, Dixon S, Lecreulx DM (1999) Crystal structure of the bifunctional N-acetylglucosamine-1-phosphate uridyltransferase from *Escherichia coli*: a paradigm for the related pyrophosphorylase superfamily. EMBO J 18: 4096-107.
- Brown-Elliott BA, Nash KA, Wallace RJ Jr (2012) Antimicrobial susceptibility testing, drug resistance mechanisms, and therapy of infections with nontuberculous mycobacteria. Clin Microbiol Rev 25(3):545–82.
- Butt A M, Tahir S, Nasrullah I, Idrees M, Lu J, Tong Y (2012) *Mycoplasma genitalium*: A comparative genomics study of metabolic pathways for the identification of drug and vaccine targets. Infect Genet Evol 12: 53–62.
- Buurman ET, Andrews B, Gao N, Hu J, Keating TA, Lahiri S, Otterbein LR, Patten AD, Stokes SS, Shapiro AB (2011) *In vitro* validation of acetyltransferase activity of GlmU as an antibacterial target in *Haemophilus influenzae*. J Biol Chem 286(47):40734-42.
- Cheng J, Wu W, Zhang Y, Li X, Jiang X, Wei G, Tao S (2013) A new computational strategy for predicting essential genes. BMC Genomics 14: 910.
- Ciulli A, Scott DE, Ando M, Reyes F, Saldanha SA, Tuck KL, Chirgadze DY, Blundell TL, Abell C (2008) Inhibition of *Mycobacterium tuberculosis* pantothenate synthetase by analogues of the reaction intermediate. Chembiochem 9(16):2606-11.
- Cushman M, Jin G, Illarionov B, Fischer M, Ladenstein R, Bacher A (2005) Design, synthesis, and biochemical evaluation of 1, 5, 6, 7-tetrahydro-6, 7-dioxo-9-D-ribitylamino-lumazines

- bearing alkyl phosphate substituents as inhibitors of lumazine synthase and riboflavin synthase. *J Org Chem* 70(20):8162-70.
- Cushman M, Yang D, Gerhardt S, Huber R, Fischer M, Kis K, Bacher A (2002) Design, synthesis, and evaluation of 6-carboxyalkyl and 6-phosphonoxyalkyl derivatives of 7-oxo-8-ribitylamino lumazines as inhibitors of riboflavin synthase and lumazine synthase. *J Org Chem* 67(16):5807-16.
- Duffield M, Cooper I, McAlister E, Bayliss M, Ford D, Oyston P (2010) Predicting conserved essential genes in bacteria: *in silico* identification of putative drug targets. *Mol Biosyst* 6: 2482–89.
- Dutta A, Singh S K, Ghosh P, Mukherjee R, Mitter S, Bandyopadhyay D (2006) *In silico* identification of potential therapeutic targets in the human pathogen *Helicobacter pylori*. *In Silico Biol* 6: 43–47.
- Fioravanti E, Adam V, Munier-Lehmann H, Bourgeois D (2005). The crystal structure of *Mycobacterium tuberculosis* thymidylate kinase in complex with 3'-azidodeoxythymidine monophosphate suggests a mechanism for competitive inhibition. *Biochem* 44(1): 130-137.
- Flynn GA, Beight DW, Bohme EH, Metcalf BW (1985) The synthesis of fluorinated aminophosphonic acid inhibitors of alanine racemase. *Tetrahedron Lett* 26(3):285-8.
- Freiberg C, Brunner NA, Schiffer G, Lampe T, Pohlmann J, Brands M, Raabe M, Häbich D, Ziegelbauer K (2004) Identification and characterization of the first class of potent bacterial acetyl-CoA carboxylase inhibitors with antibacterial activity. *J Biol Chem* 279(25): 26066-26073.
- Gonzalez-Santiago TM, Drage LA (2015) Nontuberculous *Mycobacteria*: Skin and soft tissue infections. *Dermatol Clin* 33(3):563-577.
- Halim SA, Jawad M (2015) Attempt to explore the binding mechanism of IL-1 $\beta$  inhibitors via molecular docking studies. *Med Chem* 5(10):452-7.
- Hammoudeh DI, Daté M, Yun MK, Zhang W, Boyd VA, Viacava FA, Griffith E, Lee RE, Bashford D, White SW (2014) Identification and characterization of an allosteric inhibitory site on dihydropteroate synthase. *ACS Chem Biol* 9(6): 1294-1302.
- Haouz A, Vanheusden V, Munier-Lehmann H, Froeyen M, Herdewijn P, Van Calenbergh S, Delarue M (2003) Enzymatic and structural analysis of Inhibitors designed against *Mycobacterium tuberculosis* thymidylate kinase new insights into the phosphoryl transfer mechanism. *J Biol Chem* 278(7): 4963-71.
- Hassan SS, Tiwari S, Guimarães LC, Jamal SB, Folador E, Sharma NB, de Castro Soares S, Almeida S, Ali A, Islam A, Póvoa FD (2015) Proteome scale comparative modeling for conserved drug and vaccine targets identification in *Corynebacterium pseudotuberculosis*. *BMC Genomics* 15(7):1.
- Hay RJ (2009) *Mycobacterium chelonae* -a growing problem in soft tissue infection. *Curr Opin Infect Dis* 2009; 22: 99–101
- He X, Reynolds KA (2002) Purification, characterization, and identification of novel inhibitors of the  $\beta$ -ketoacyl-acyl carrier protein synthase III (FabH) from *Staphylococcus aureus*. *Antimicrob Agents Chemother* 46(5): 1310-1318.
- He X, Alian A, de Montellano PRO (2007) Inhibition of the *Mycobacterium tuberculosis* enoyl acyl carrier protein reductase InhA by arylamides. *Bioorganic & Med Chem* 15(21): 6649-6658.

- He X, Reeve AM, Desai UR, Kellogg GE, Reynolds KA (2004) 1, 2-dithiole-3-ones as potent inhibitors of the bacterial 3-ketoacyl acyl carrier protein synthase III (FabH). *Antimicrob Agents Chemother* 48(8): 3093-3102.
- Heath RJ, Li J, Roland GE, Rock CO (2000) Inhibition of the *Staphylococcus aureus* NADPH-dependent enoyl-acyl carrier protein reductase by triclosan and hexachlorophene. *J Biol Chem* 275(7), 4654-4659.
- Hoshino K, Kitamura A, Morrissey I, Sato K, Kato JI, Ikeda H (1994) Comparison of inhibition of *Escherichia coli* topoisomerase IV by quinolones with DNA gyrase inhibition. *Antimicrob Agents Chemother* 38(11): 2623-2627.
- Hu K, Kobayashi H, Dong A, Iwasaki S, Yao X (2000) Antifungal, antimetabolic and anti-HIV-1 agents from the roots of *Wikstroemia indica*. *Planta Medica*. 66(06):564-7.
- Huang W, Zhang X, Wang Y, Ye W, Ooi VE, Chung HY, Li Y (2010) Antiviral biflavonoids from *Radix wikstroemiae* (Liaogewanggen). *Chinese Med* 5(1):23.
- Hung AW, Silvestre HL, Wen S, Ciulli A, Blundell TL, Abell C (2009) Application of fragment growing and fragment linking to the discovery of inhibitors of *Mycobacterium tuberculosis* pantothenate synthetase. *Angewandte Chemie Intl Ed* 48(45): 8452-8456.
- Ito H, Ura A, Oyamada Y, Tanitame A, Yoshida H, Yamada S, Wachi M, Yamagishi JI (2006) A 4-aminofurazan derivative—A189—inhibits assembly of bacterial cell division protein FtsZ *in vitro* and *in vivo*. *Microbiol Immunol* 50(10): 759-764.
- Jaén-Luchoro D, Salvà-Serra F, Aliaga-Lozano F, Seguí C, Busquets A, Ramírez A, Ruíz M, Gomila M, Lalucat J, Bannasar-Figueras A (2016) Complete genome sequence of *Mycobacterium chelonae* type strain CCUG 47445, a rapidly growing species of nontuberculous mycobacteria. *Genome Announce* 4(3): e00550-16
- Junaid M, Almuqri E A, Liu J, Zhang H (2016) Analyses of the binding between water soluble C60 derivatives and potential drug targets through a molecular docking approach. *PLOS One* 11(2): 0147761.
- Kaiser J, Illarionov B, Rohdich F, Eisenreich W, Saller S, Van den Brulle J, Cushman M, Bacher A, Fischer M (2007) A high-throughput screening platform for inhibitors of the riboflavin biosynthesis pathway. *Anal Biochem* 365(1): 52-61.
- Kennedy BS, Bedard B, Younge M, Tuttle D, Ammerman E, Ricci J, Doniger AS, Escuyer VE, Mitchell K, Noble-Wang JA, O'Connell HA (2012) Outbreak of *Mycobacterium chelonae* infection associated with tattoo ink. *N Engl J Med* 367(11):1020–4.
- Khodursky AB, Cozzarelli NR (1998) The mechanism of inhibition of topoisomerase IV by quinolone antibacterials. *J Biol Chem* 273(42): 27668-27677.
- Kjoller LI, Sjooberg BM, Thelander L 1982 Characterization of the active site of ribonucleotide reductase of *Escherichia coli*, bacteriophage T4 and mammalian cells by inhibition studies with hydroxyurea analogues. *Eur J Biochem* 125(1): 75-81.
- Kosinska U, Carnrot C, Eriksson S, Wang L, Eklund H (2005) Structure of the substrate complex of thymidine kinase from *Ureaplasma urealyticum* and investigations of possible drug targets for the enzyme. *Febs J* 272(24): 6365-6372.
- Kostrewa D, D'Arcy A, Takacs B, Kamber M (2001) Crystal structures of *Streptococcus pneumoniae* N-acetylglucosamine-1-phosphate uridylyltransferase, GlmU, in apo form at 2.33 Å resolution and in complex with UDP-N-acetylglucosamine and Mg<sup>2+</sup> at 1.96 Å resolution. *J Mol Biol* 305: 279-89.

- Kumar S, Chaudhary K, Foster JM, Novelli JF, Zhang Y, Wang S, Spiro D, Ghedin E, Carlow CK (2007) Mining predicted essential genes of *Brugia malayi* for nematode drug targets. PLoS One 2 (11):1189.
- Lee JY, Jeong KW, Shin S, Lee JU, Kim Y (2012). Discovery of novel selective inhibitors of *Staphylococcus aureus*  $\beta$ -ketoacyl acyl carrier protein synthase III. Eur J Med Chem 47:261-269.
- Lemaitre B, Girardin S E (2013) Translation inhibition and metabolic stress pathways in the host response to bacterial pathogens. Nat Rev Microbiol 11: 365–69.
- Li Y, Wong YL, Ng FM, Liu B, Wong YX, Poh ZY, Liu S, Then SW, Lee MY, Ng HQ, Huang Q (2016) *Escherichia coli* topoisomerase IV E subunit and an inhibitor binding mode revealed by NMR spectroscopy. J Biol Chem 291(34): 17743-17753.
- Li Y, Zhou Y, Ma Y, Li X (2011) Design and synthesis of novel cell wall inhibitors of *Mycobacterium tuberculosis* GlmM and GlmU. Carbohydrate Res 346(13): 1714-1720.
- Luckner SR, Liu N, Am Ende CW, Tonge PJ, Kisker C (2010). A slow, tight binding inhibitor of InhA, the enoyl-acyl carrier protein reductase from *Mycobacterium tuberculosis*. J Biol Chem 285(19): 14330-14337.
- McKay GA, Reddy R, Arhin F, Belley A, Lehoux D, Moeck G, Sarmiento I, Parr TR, Gros P, Pelletier J, Far AR (2006). Triaminotriazine DNA helicase inhibitors with antibacterial activity. Bioorg Med Chem Lett 16(5): 1286-1290.
- Mdluli K, Slayden RA, Zhu Y, Ramaswamy S, Pan X, Mead D, Crane DD, Musser JM, Barry CE (1998) Inhibition of a *Mycobacterium tuberculosis*  $\beta$ -ketoacyl ACP synthase by isoniazid. Science 280(5369): 1607-1610.
- Mehra R, Rani C, Mahajan P, Vishwakarma RA, Khan IA, Nargotra A (2016). Computationally guided identification of novel *Mycobacterium tuberculosis* GlmU inhibitory leads, their optimization and *in vitro* validation. ACS Comb Sci 18(2): 100-116.
- Mehra R, Sharma R, Khan IA, Nargotra A (2015) Identification and optimization of *Escherichia coli* GlmU inhibitors: an *in silico* approach with validation thereof. Eur J Med Chem 92: 78-90.
- Mills SD, Eakin AE, Buurman ET, Newman JV, Gao N, Huynh H, Johnson KD, Lahiri S, Shapiro AB, Walkup GK, Yang W (2011) Novel bacterial NAD<sup>+</sup>-dependent DNA ligase inhibitors with broad-spectrum activity and antibacterial efficacy *in vivo*. Antimicrob Agents Chemother 55(3):1088-1096.
- Min J, Lin D, Zhang Q, Zhang J, Yu Z (2012) Structure-based virtual screening of novel inhibitors of the uridyltransferase activity of *Xanthomonas oryzae* pv. *oryzae* GlmU. Eur J Med Chem 53: 150-158.
- Mochalkin I, Lightle S, Narasimhan L, Bornemeier D, Melnick M, VanderRoest S, McDowell L (2008) Structure of a small-molecule inhibitor complexed with GlmU from *Haemophilus influenzae* reveals an allosteric binding site. Protein Sci 17: 577-82.
- Moche M, Schneider G, Edwards P, Dehesh K, Lindqvist Y (1999) Structure of the complex between the antibiotic cerulenin and its target,  $\beta$ -ketoacyl-acyl carrier protein synthase. J Biol Chem 274(10): 6031-6034.
- Moolhuijzen PM, Lew-Tabor AE, Wlodek BM, Agüero FG, Comerci DJ, Ugalde RA, Sanchez DO, Appels R, Bellgard M (2009) Genomic analysis of *Campylobacter fetus* subspecies: identification of candidate virulence determinants and diagnostic assay targets. BMC Microbiol 9: 86.

- Moore EC (1969) The effects of ferrous ion and dithioerythritol on inhibition by hydroxyurea of ribonucleotide reductase. *Cancer Res* 29(2): 291-295.
- Moraes GL, Gomes GC, de Sousa PR, Alves CN, Govender T, Kruger HG, Maguire GE, Lamichhane G, Lameira J (2015) Structural and functional features of enzymes of *Mycobacterium tuberculosis* peptidoglycan biosynthesis as targets for drug development. *Tuberculosis* 95: 95-111.
- Mumtaz A, Ashfaq UA, ul Qamar MT, Anwar F, Gulzar F, Ali MA, Saari N, Pervez MT (2016) MPD3: a useful medicinal plants database for drug designing. *Nat ProdRes* 1-9.
- Nie Z, Perretta C, Lu J, Su Y, Margosiak S, Gajiwala KS, Cortez J, Nikulin V, Yager KM, Appelt K, Chu S (2005) Structure-based design, synthesis, and study of potent inhibitors of  $\beta$ -ketoacyl-acyl carrier protein synthase III as potential antimicrobial agents. *J Med Chem* 48(5): 1596-1609.
- Pan XS, Fisher LM (1998) DNA gyrase and topoisomerase IV are dual targets of clinafloxacin action in *Streptococcus pneumoniae*. *Antimicrob Agents Chemother* 42(11): 2810-2816.
- Park B, Awasthi D, Chowdhury SR, Melief EH, Kumar K, Knudson SE, Slayden RA, Ojima I (2014) Design, synthesis and evaluation of novel 2, 5, 6-trisubstituted benzimidazoles targeting FtsZ as antitubercular agents. *Bioorg Med Chem* 22(9): 2602-2612.
- Patin D, Bayliss M, Lecreulx D M, Oyston P, Blanot D (2015) Purification and biochemical characterisation of GlmU from *Yersinia pestis*. *Arch Microbiol* 197(3):371-78.
- Patnaik S, Mohanty I, Panda P, Sahu S, Dash M (2013) Disseminated *Mycobacterium chelonae* infection: Complicating a case of hidradenitis suppurativa. *Indian Dermatol Online J* 4(4):336-396.
- Pereira MP, Blanchard JE, Murphy C, Roderick SL, Brown ED (2009) High-throughput screening identifies novel inhibitors of the acetyltransferase activity of *Escherichia coli* GlmU. *Antimicrob Agents Chemother* 53(6): 2306-2311.
- Perumal D, Lim CS, Sakharkar KR, Sakharkar MK (2007) Differential genome analyses of metabolic enzymes in *Pseudomonas aeruginosa* for drug target identification. *In Silico Biol* 4(5): 453-65.
- Polyak SW, Abell AD, Wilce MCJ, Zhang L, Booker GW (2012) Structure, function and selective inhibition of bacterial acetyl-coa carboxylase. *Appl Microbiol Biotechnol* 93(3): 983-992.
- Rani C, Mehra R, Sharma R, Chib R, Wazir P, Nargotra A, Khan IA (2015) High-throughput screen identifies small molecule inhibitors targeting acetyltransferase activity of *Mycobacterium tuberculosis* GlmU. *Tuberculosis* 95(6):664-77.
- Rani C, Khan IA (2016). UDP-GlcNAc pathway: Potential target for inhibitor discovery against *M. tuberculosis*. *Eur J Pharm Sci* 83: 62-70.
- Roland S, Ferone R, Harvey RJ, Styles VL, Morrison RW (1979) The characteristics and significance of sulfonamides as substrates for *Escherichia coli* dihydropteroate synthase. *J Biol Chem* 254(20): 10337-10345.
- Sakharkar KR, Sakharkar MK, Chow VT (2004) A novel genomics approach for the identification of drug targets in pathogens, with special reference to *Pseudomonas aeruginosa*. *In silico Biol* 4 (3): 355-60.
- Sarangi AN, Lohani M, Aggarwal R (2015) Proteome mining for drug target identification in *Listeria monocytogenes* EGD-e and structure based virtual screening of a candidate drug target penicillin binding protein. *J Microbiol Methods* 111:9-18.
- Shanmugam A, Natarajan J (2010) Computational genome analyses of metabolic enzymes in *Mycobacterium leprae* for drug target identification. *Bioinformatics* 4:392-95.

- Shanmugham B, Pan A (2013) Identification and characterization of potential therapeutic candidates in emerging human pathogen *Mycobacterium abscessus*: A novel hierarchical *in silico* approach. PLOS One 8(3):59126.
- Sharma R, Lambu M R, Jamwa U, Rani C, Chib R, Wazir P (2016) *Escherichia coli* N-Acetylglucosamine-1- Phosphate-Uridyltransferase/ Glucosamine-1- Phosphate-Acetyltransferase (GlmU) inhibitory activity of terreic acid isolated from *Aspergillus terreus*. J Biomol Screen 1-12.
- Shi G, Blaszczyk J, Ji X, Yan H (2001) Bisubstrate analogue inhibitors of 6-hydroxymethyl-7, 8-dihydropterin pyrophosphokinase: synthesis and biochemical and crystallographic studies. J Med Chem 44(9): 1364-1371.
- Silverio-Machado R, Couto BR, dos Santos MA (2014) Retrieval of Enterobacteriaceae drug targets using singular value decomposition. Bioinformatics btu792.
- Slayden RA, Belisle JT (2009) Morphological features and signature gene response elicited by inactivation of FtsI in *Mycobacterium tuberculosis*. J Antimicrob Chemother, 63(3): 451-457.
- Sledz P, Silvestre HL, Hung AW, Ciulli A, Blundell TL, Abell C (2010) Optimization of the interligand overhauser effect for fragment linking: application to inhibitor discovery against *Mycobacterium tuberculosis* pantothenate synthetase. J Am Chem Soc 132(13): 4544-4545.
- Soares da Costa TP, Tieu W, Yap MY, Zvarec O, Bell JM, Turnidge JD, Wallace JC, Booker, GW, Wilce MC, Abell AD, Polyak SW (2012) Biotin analogues with antibacterial activity are potent inhibitors of biotin protein ligase. ACS Med Chem Lett 3(6):509-514.
- Srivastava SK, Tripathi RP, Ramachandran R (2005) NAD<sup>+</sup>-dependent DNA ligase (Rv3014c) from *Mycobacterium tuberculosis* crystal structure of the adenylation domain and identification of novel inhibitors. J Biol Chem 280(34):30273-30281.
- Stokes SS, Albert R, Buurman ET, Andrews B, Shapiro AB, Green OM, McKenzie AR, Otterbein LR (2012) Inhibitors of the acetyltransferase domain of N-acetylglucosamine-1-phosphate-uridylyltransferase/glucosamine-1-phosphate-acetyltransferase (GlmU). Part 2: Optimization of physical properties leading to antibacterial aryl sulfonamides. Bioorganic & Med Chem Lett 22(23):7019-7023.
- Strzyz P (2016) Protein translocation channelling the route for ER misfolded proteins. Nat Rev Mol Cell Biol 17:462–463.
- Taniguchi M, Baba K (1996) Three biflavonoids from *Daphne odora*. Phytochem. 42(5):1447.
- Tholander F, Sjöberg BM (2012) Discovery of antimicrobial ribonucleotide reductase inhibitors by screening in microwell format. Proc Nat Acad Sci 109(25): 9798-9803.
- Tortoli E (2014) Microbiological features and clinical relevance of new species of the genus *Mycobacterium*. Clin Microbiol Rev 27(4):727-752.
- Tran AT, Wen D, West NP, Baker EN, Britton WJ, Payne RJ (2013). Inhibition studies on *Mycobacterium tuberculosis* N-acetylglucosamine-1-phosphate uridylyltransferase (GlmU). Org Biomol Chem 11(46): 8113-8126.
- Tsirigos KD, Peters C, Shu N, Käll L, Elofsson A (2015) The TOPCONS web server for consensus prediction of membrane protein topology and signal peptides. Nucleic Acids Res gkv485
- Uddin R, Saeed K, Khan W, Azam SS, Wadood A (2015) Metabolic pathway analysis approach: Identification of novel therapeutic target against methicillin resistant *Staphylococcus aureus*. Gene 556:213–26.

- Velaparthi S, Brunsteiner M, Uddin R, Wan B, Franzblau SG, Petukhov PA (2008) 5-tert-Butyl-N-pyrazol-4-yl-4, 5, 6, 7-tetrahydrobenzo [d] isoxazole-3-carboxamide derivatives as novel potent inhibitors of *Mycobacterium tuberculosis* pantothenate synthetase: initiating a quest for new antitubercular drugs. *J Med Chem* 51(7):1999-2002.
- Wang Z, Sun H, Yao X, Li D, Xu L, Li Y, Tian S, Hou T (2016) Comprehensive evaluation of ten docking programs on a diverse set of protein–ligand complexes: the prediction accuracy of sampling power and scoring power. *Phys Chem* 18:12964-75.
- Wang J, Galgoci A, Kodali S, Herath KB, Jayasuriya H, Dorso K, Vicente F, González A, Cully D, Bramhill D, Singh S (2003) Discovery of a small molecule that inhibits cell division by blocking FtsZ, a novel therapeutic target of antibiotics. *J Biol Chem* 278(45): 44424-44428.
- Wang J, Soisson SM, Young K, Shoop W, Kodali S, Galgoci A, Painter R, Parthasarathy G, Tang YS, Cummings R, Ha S (2006) Platensimycin is a selective FabF inhibitor with potent antibiotic properties. *Nature* 441(7091):358-361.
- Wang J, Su C, Neuhard J, Eriksson S (2000) Expression of human mitochondrial thymidine kinase in *Escherichia coli*: correlation between the enzymatic activity of pyrimidine nucleoside analogues and their inhibitory effect on bacterial growth. *Biochem Pharmacol* 59(12): 1583-1588.
- Wei W, Ning LW, Ye YN, Guo FB (2013) Geptop: A Gene Essentiality Prediction Tool for Sequenced Bacterial Genomes Based on Orthology and Phylogeny. *PLOS One* 8(8): 72343.
- Werner MM, Patel BA, Talele TT, Ashby CR, Li Z, Zauhar RJ (2015) Dual inhibition of *Staphylococcus aureus* DNA gyrase and topoisomerase IV activity by phenylalanine-derived (Z)-5-arylmethylidene rhodanines. *Bioorg Med Chem* 23(18):6125-6137.
- White EL, Southworth K, Ross L, Cooley S, Gill RB, Sosa MI, Manouvakhova A, Rasmussen L, Goulding C, Eisenberg D, Fletcher TM (2007) A novel inhibitor of *Mycobacterium tuberculosis* pantothenate synthetase. *J Biomol Screen* 12(1):100-105.
- Yang Y, Gao P, Liu Y, Ji X, Gan M, Guan Y, Hao X, Li Z, Xiao C (2011) A discovery of novel *Mycobacterium tuberculosis* pantothenate synthetase inhibitors based on the molecular mechanism of actinomycin D inhibition. *Bioorg Med Chem Lett* 21(13):3943-3946.
- Nancy YY, Wagner JR, Laird MR, Melli G, Rey S, Lo R, Dao P, Sahinalp SC, Ester M, Foster LJ, Brinkman FS (2010) PSORTb 3.0: improved protein subcellular localization prediction with refined localization subcategories and predictive capabilities for all prokaryotes. *Bioinformatics* 26:1608–15.
- Zhang Z, Bulloch EM, Bunker RD, Baker EN, Squire CJ (2009) Structure and function of GlmU from *Mycobacterium tuberculosis*. *Acta Crystallogr D Biol Crystallogr* 65:275-83.
- Zhang W, Jones VC, Scherman MS, Mahapatra S, Crick D, Bhamidi S, Xin Y, McNeil MR, Ma Y (2008) Expression, essentiality, and a microtiter plate assay for mycobacterial GlmU, the bifunctional glucosamine-1-phosphate acetyltransferase and N-acetylglucosamine-1-phosphate uridylyltransferase. *Int J Biochem Cell Bio* 40(11):2560-2571.
- Zhao Y, Bacher A, Illarionov B, Fischer M, Georg G, Ye QZ, Fanwick PE, Franzblau SG, Wan B, Cushman M (2009) Discovery and development of the covalent hydrates of trifluoromethylated pyrazoles as riboflavin synthase inhibitors with antibiotic activity against *Mycobacterium tuberculosis*. *J Org Chem* 74(15):5297-5303.
- Zhao Y, Shadrack WR, Wallace MJ, Wu Y, Griffith EC, Qi J, Yun MK, White SW, Lee RE (2016) Pterin–sulfa conjugates as dihydropteroate synthase inhibitors and antibacterial agents. *Bioorg Med Chem Lett* 26(16):3950-3954.



Zhuo HS, Ni HH, Yun MQ, He MM, Liang ZM, Dai Hao Fu JY, Hai WQ, Xing ZY (2015) The phytochemicals with antagonistic activities toward pathogens of a disease complex caused by *Meloidogyne incognita* and *Ralstonia solanacearum*. J Pure Appl Microbiol 9:209-13.

## Figure/ Table legends

**Fig. 1.** Workflow describing subtractive proteomics with respective number of obtained sequences. *In silico* parameter analysis included hydrophobicity, sub-cellular location prediction, molecular weight etc.

**Fig. 2.** (A) Docked GlnU with daphnodorin G (3D conformation) and (B) 2D conformation of docked complex showing residue interactions.

**Table 1.** Predicted druggable proteome of *Mycobacterium chelonae*. GRAVY is average hydrophobicity of the protein measured by Kyte-Doolittle algorithm. Hydrophobicity value below 0 are indicates globularity (means protein is hydrophilic), while score value of above 0 indicates protein to be membranous (hydrophobic).

**Table 2.** Top 5 compounds obtained with best inhibition score against GlnU of *Mycobacterium chelonae*.

**Supplementary File 1.** List of bacterial species used for essential proteome prediction of *Mycobacterium chelonae*.

**Supplementary File 2.** Essential proteome of *Mycobacterium chelonae*.

**Supplementary File 3.** Non-homologous core proteome of *Mycobacterium chelonae*.

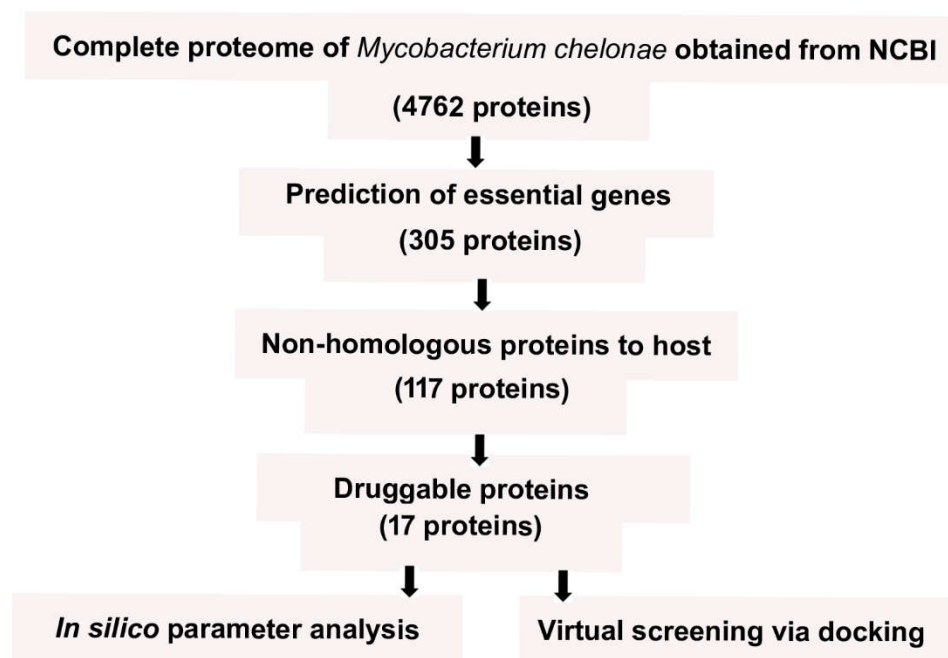

**Fig. 1.**

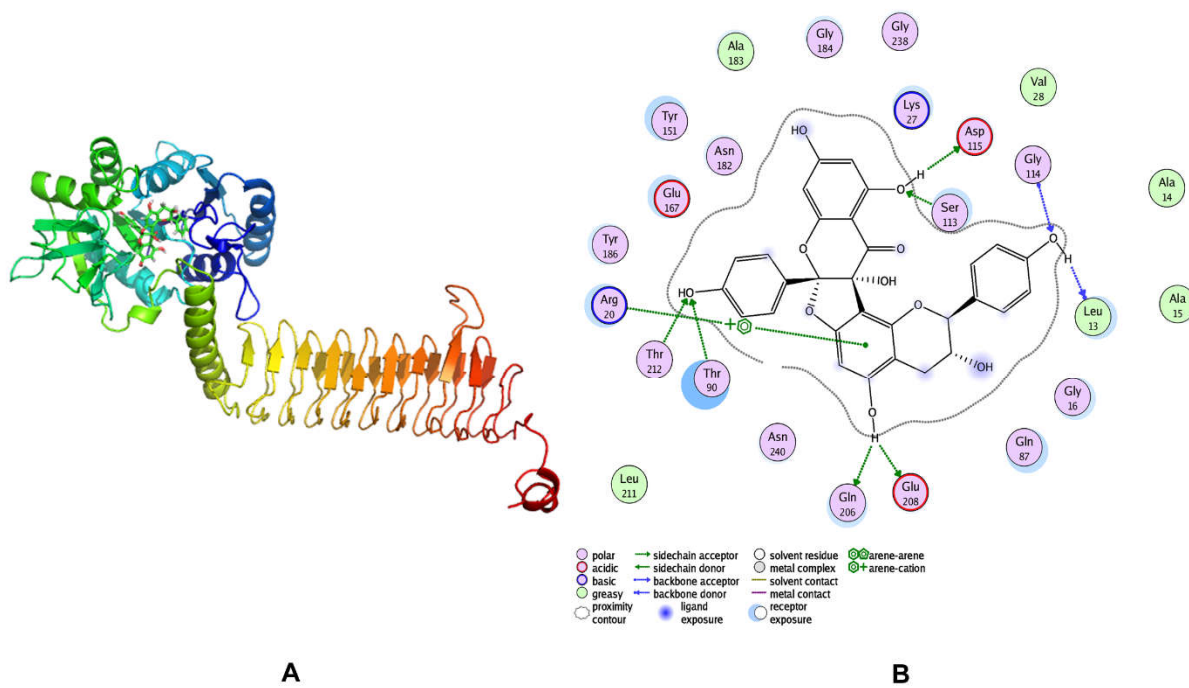

**Fig. 2.**

**Table 1. Predicted druggable proteome of *Mycobacterium chelonae*. GRAVY is average hydrophobicity of the protein measured by Kyte-Doolittle algorithm. Hydrophobicity value below 0 are indicates globularity (means protein is hydrophilic), while score value of above 0 indicates protein to be membranous (hydrophobic).**

| Serial No. | Accession No.                | Protein name                                                | No. of Matches | Mol. Wt. | Length (amino acids) | GRAVY  | Subcellular localization | KEGG Pathway                                                 | Experimental evidence for druggability in bacteria                                                                                            |
|------------|------------------------------|-------------------------------------------------------------|----------------|----------|----------------------|--------|--------------------------|--------------------------------------------------------------|-----------------------------------------------------------------------------------------------------------------------------------------------|
| 1          | <a href="#">WP_030093515</a> | 6,7-dimethyl-8-ribityllumazine synthase/riboflavin synthase | 1              | 16775.9  | 162                  | 0.173  | Unknown                  | Riboflavin metabolism, biosynthesis of secondary metabolites | Cushman <i>et al.</i> , 2002; Cushman <i>et al.</i> , 2005; Kaiser <i>et al.</i> , 2007; Zhao <i>et al.</i> , 2009                            |
| 2          | <a href="#">WP_030095371</a> | acyl carrier protein                                        | 1              | 10805.0  | 99                   | -0.207 | Cytoplasmic              | Fatty acid biosynthesis                                      | Madluli <i>et al.</i> , 1998; Moche <i>et al.</i> , 1999; Heath <i>et al.</i> , 2000; Wang <i>et al.</i> , 2006; Luckner <i>et al.</i> , 2010 |
| 3          | <a href="#">WP_030097637</a> | replicative DNA helicase                                    | 1              | 50372.3  | 458                  | -0.323 | Cytoplasmic membrane     | DNA replication                                              | McKay <i>et al.</i> , 2006; Aiello <i>et al.</i> , 2009                                                                                       |
| 4          | <a href="#">WP_046251970</a> | DNA topoisomerase IV subunit B                              | 3              | 74147.8  | 675                  | -0.371 | Cytoplasmic              | DNA repair and recombination                                 | Hoshino <i>et al.</i> , 1994; Khodursky and Cozzarelli, 1998; Pan and Fisher, 1998; Anderson <i>et al.</i> , 1999; Werner <i>et</i>           |

|   |                               |                                                                                                                   |   |         |     |        |                      |                                                                          |  |                                                                                                                                                                           |
|---|-------------------------------|-------------------------------------------------------------------------------------------------------------------|---|---------|-----|--------|----------------------|--------------------------------------------------------------------------|--|---------------------------------------------------------------------------------------------------------------------------------------------------------------------------|
|   |                               |                                                                                                                   |   |         |     |        |                      |                                                                          |  | al., 2015; Li <i>et al.</i> , 2016                                                                                                                                        |
| 5 | <a href="#">WP_046252_393</a> | dihydropteroate synthase                                                                                          | 2 | 37365.3 | 350 | -0.165 | Cytoplasmic          | Folate biosynthesis                                                      |  | Roland <i>et al.</i> , 1979; Hammoudeh <i>et al.</i> , 2014; Zhao <i>et al.</i> , 2016                                                                                    |
| 6 | <a href="#">WP_046252_395</a> | 2-amino-4-hydroxy-6-hydroxymethyl-dihydropteridine diphosphokinase                                                | 1 | 19332.9 | 178 | -0.054 | Cytoplasmic          | Tetrahydrofolate biosynthesis                                            |  | Shi <i>et al.</i> , 2001                                                                                                                                                  |
| 7 | <a href="#">WP_046252_399</a> | pantoate - beta-alanine ligase/ pantothenate synthetase                                                           | 1 | 33527.3 | 314 | -0.057 | Cytoplasmic          | Pantothenate biosynthesis                                                |  | White <i>et al.</i> , 2007; Ciulli <i>et al.</i> , 2008; Velaparhi <i>et al.</i> , 2008; Hung <i>et al.</i> , 2009; Sledz <i>et al.</i> , 2010; Yang <i>et al.</i> , 2011 |
| 8 | <a href="#">WP_046252_764</a> | 3-oxoacyl-ACP synthase/beta-ketoacyl acyl carrier protein synthase                                                | 2 | 35485.1 | 340 | 0.070  | Cytoplasmic          | Lipid synthesis                                                          |  | He and Rynold, 2002; He <i>et al.</i> , 2004; Nie <i>et al.</i> , 2005; Lee <i>et al.</i> , 2012                                                                          |
| 9 | <a href="#">WP_046252_769</a> | bifunctional N-acetylglucosamine-1-phosphate uridylyltransferase (GlmU)/glucosamine-1-phosphate acetyltransferase | 1 | 50208.3 | 482 | -0.026 | Cytoplasmic          | Amino sugar and nucleotide sugar metabolism, Biosynthesis of antibiotics |  | Pereira <i>et al.</i> , 2009; Buurman <i>et al.</i> , 2011; Stokes <i>et al.</i> , 2012; Min <i>et al.</i> , 2012; Mehra <i>et al.</i> , 2015                             |
| 1 | <a href="#">WP_046253_413</a> | cell division protein FtsI                                                                                        | 1 | 68842.9 | 642 | -0.300 | Cytoplasmic membrane | Peptidoglycan biosynthesis, beta-Lactam resistance                       |  | Slayden and Belisle, 2009                                                                                                                                                 |
| 1 | <a href="#">WP_046253_421</a> | cell division protein FtsZ                                                                                        | 1 | 38795.6 | 383 | 0.076  | Cytoplasmic          | Chromosome partition, cytoskeleton,                                      |  | Wang <i>et al.</i> , 2003b; Ito <i>et al.</i> , 2006;                                                                                                                     |

|   |                                      |                                                                                           |   |         |     |        |                      |                                                                                    |                                                                                                                       |
|---|--------------------------------------|-------------------------------------------------------------------------------------------|---|---------|-----|--------|----------------------|------------------------------------------------------------------------------------|-----------------------------------------------------------------------------------------------------------------------|
|   |                                      |                                                                                           |   |         |     |        |                      | toxin-anti-toxin                                                                   | Park <i>et al.</i> , 2014                                                                                             |
| 1 | <a href="#"><u>WP_046253_835</u></a> | enoyl-[acyl-carrier-protein] reductase (InhA)                                             | 3 | 28724.0 | 269 | 0.152  | Cytoplasmic membrane | Lipid biosynthesis                                                                 | Heath <i>et al.</i> , 2000; He <i>et al.</i> , 2007; Luckner <i>et al.</i> , 2010                                     |
| 1 | <a href="#"><u>WP_046254_273</u></a> | DNA ligase (NAD(+)) LigA                                                                  | 1 | 74430.9 | 684 | -0.226 | Cytoplasmic          | DNA replication, Base excision repair, nucleotide excision repair, mismatch repair | Brötz-Oesterhelt <i>et al.</i> , 2003; Srivastava <i>et al.</i> , 2005; Mills <i>et al.</i> , 2011                    |
| 1 | <a href="#"><u>WP_046254_500</u></a> | thymidylate kinase                                                                        | 1 | 23403.1 | 212 | -0.394 | Cytoplasmic          | Pyrimidine metabolism                                                              | Wang <i>et al.</i> , 2000; Haouz <i>et al.</i> , 2003; Fioravanti <i>et al.</i> , 2005; Kosinska <i>et al.</i> , 2005 |
| 1 | <a href="#"><u>WP_046254_518</u></a> | biotin--[acetyl-CoA-carboxylase] ligase                                                   | 1 | 27934.5 | 264 | -0.084 | Cytoplasmic          | Biotin metabolism                                                                  | Freiberg <i>et al.</i> , 2004; Polyak <i>et al.</i> , 2012; Soares da Costa <i>et al.</i> , 2012                      |
| 1 | <a href="#"><u>WP_046254_614</u></a> | alanine racemase                                                                          | 1 | 41861.3 | 397 | -0.008 | Cytoplasmic          | D-Alanine metabolism, Vancomycin resistance                                        | Badet and Walsh, 1985; Flynn <i>et al.</i> , 1985; Anthony <i>et al.</i> , 2011                                       |
| 1 | <a href="#"><u>WP_046255_923</u></a> | ribonucleotide-diphosphate reductase subunit beta/ ribonucleoside diphosphate reductase-β | 2 | 36899.2 | 320 | -0.437 | Unknown              | Purine and pyrimidine metabolism                                                   | Moore, 1969; Tholander and Sjöberg, 2012                                                                              |

**Table 2.**

| Serial No. | Compound                                                                                                                                  | S-value | Metabolite forming plant                                                                                                                                                                                                                                                                                                                                                                                                                                                                                                                                                                                                                                                                                                                                                             |
|------------|-------------------------------------------------------------------------------------------------------------------------------------------|---------|--------------------------------------------------------------------------------------------------------------------------------------------------------------------------------------------------------------------------------------------------------------------------------------------------------------------------------------------------------------------------------------------------------------------------------------------------------------------------------------------------------------------------------------------------------------------------------------------------------------------------------------------------------------------------------------------------------------------------------------------------------------------------------------|
| 1          | Daphnodorin G                                                                                                                             | -7.67   | <i>Daphne odora</i>                                                                                                                                                                                                                                                                                                                                                                                                                                                                                                                                                                                                                                                                                                                                                                  |
| 2          | Durantinin I                                                                                                                              | -6.90   | <i>Duranta repens</i>                                                                                                                                                                                                                                                                                                                                                                                                                                                                                                                                                                                                                                                                                                                                                                |
| 3          | 5,7-Dihydroxy-4'-methoxy-6,8-di-C-methylflavanone 7-(4,6-digalloylglucoside) Mattecucinol-7-O-[4",6"-di-O-galloyl]-beta-D-glucopyranoside | -6.15   | <i>Miconia myriantha</i>                                                                                                                                                                                                                                                                                                                                                                                                                                                                                                                                                                                                                                                                                                                                                             |
| 4          | Chebulinic acid                                                                                                                           | -5.89   | <i>Terminalia chebula</i> , <i>Caesalpinia coriana</i> ,<br><i>Phyllanthus emblica</i>                                                                                                                                                                                                                                                                                                                                                                                                                                                                                                                                                                                                                                                                                               |
| 5          | Myricitrin                                                                                                                                | -5.85   | <i>Pistacia weinmannifolia</i> J.Pisson ex.Franch,<br><i>Rhus parviflora</i> ,<br><i>Haplopappus bailahuen</i> ,<br><i>Warburgia stuhlmannii</i> ,<br><i>Cornus kousa</i> ,<br><i>Davidsonia pruriens</i> ,<br><i>Doliocarpus spraguei</i> ,<br><i>Acacia aroma</i> ,<br><i>Acacia saligna</i> ,<br><i>Caesalpinia pulcherrima</i> ,<br><i>Desmanthus illinoensis</i> ,<br><i>Flemingia congesta</i> ,<br><i>Quercus rubra</i> ,<br><i>Patersonia spp.</i> ,<br><i>Juglans mandshurica</i> ,<br><i>Leea thorelii</i> Gagnep,<br><i>Myrica rubra</i> ,<br><i>Lysimachia spp.</i> ,<br><i>Eugenia edulis</i> ,<br><i>Luma chequen</i> ,<br><i>Plinia pinnata</i> ,<br><i>Nymphaea caerulea</i> ,<br><i>Nymphaea lotus</i> ,<br><i>Phyllanthus emblica</i> ,<br><i>Abies amabilis</i> , |



|  |  |  |                                                                                                                                                                                                                                                                                                                                                                                                                                                                                                                                         |
|--|--|--|-----------------------------------------------------------------------------------------------------------------------------------------------------------------------------------------------------------------------------------------------------------------------------------------------------------------------------------------------------------------------------------------------------------------------------------------------------------------------------------------------------------------------------------------|
|  |  |  | <i>Armeria sp.</i> ,<br><i>Ceratostigma willmottianum</i> ,<br><i>Limonium spp.</i> ,<br><i>Eskemukerjea megacarpum HARA</i> ,<br><i>Chondropetalum spp.</i> ,<br><i>Elegia capensis</i> ,<br><i>Diploknema butyracea</i> ,<br><i>Manilkara zapota cv. Tikal</i> ,<br><i>Leptolaena diospyroidea</i> ,<br><i>Leptolaena pauciflora</i> ,<br><i>Heuchera spp.</i> ,<br><i>Lithophragma spp.</i> ,<br><i>Metasequoia glyptostroboides</i> ,<br><i>Hedychium spp.</i> ,<br><i>Peltiphyllum peltatum</i> ,<br><i>Sarcolaeana multiflora</i> |
|--|--|--|-----------------------------------------------------------------------------------------------------------------------------------------------------------------------------------------------------------------------------------------------------------------------------------------------------------------------------------------------------------------------------------------------------------------------------------------------------------------------------------------------------------------------------------------|
